# Supplementary material
Source: bioRxiv or medRxiv preprint supplement (https://www.biorxiv.org/highwire/filestream/67827/field_highwire_adjunct_files/0/223008-1.pdf)
Supplement: Supplementary file [file 223008-1.pdf]

## Supplemental Data

**Table S1: Reciprocal crosses**

| Cross                    | <i>lrx8</i> <sup>-/-</sup> <i>lrx9</i> <sup>-/-</sup> <i>lrx10</i> <sup>-/+</sup><br>X Col | Col X<br><i>lrx8</i> <sup>-/-</sup> <i>lrx9</i> <sup>-/-</sup> <i>lrx10</i> <sup>-/+</sup> | <i>lrx8</i> <sup>-/-</sup> <i>lrx9</i> <sup>-/-</sup> <i>lrx11</i> <sup>-/+</sup><br>X Col | Col X<br><i>lrx8</i> <sup>-/-</sup> <i>lrx9</i> <sup>-/-</sup> <i>lrx11</i> <sup>-/+</sup> |
|--------------------------|--------------------------------------------------------------------------------------------|--------------------------------------------------------------------------------------------|--------------------------------------------------------------------------------------------|--------------------------------------------------------------------------------------------|
| F1                       | <i>lrx10</i> <sup>-/+</sup> = 29                                                           | <i>lrx10</i> <sup>-/+</sup> = 8                                                            | <i>lrx11</i> <sup>-/+</sup> = 31                                                           | <i>lrx11</i> <sup>-/+</sup> = 9                                                            |
| TE                       | 96.7%                                                                                      | 26.7%                                                                                      | 103.3%                                                                                     | 30%                                                                                        |
| Chi <sup>2</sup> P-value | 1                                                                                          | 0.0001                                                                                     | 1                                                                                          | 0.0001                                                                                     |

  

| Cross                    | <i>lrx8</i> <sup>-/-</sup> <i>lrx9</i> <sup>-/-</sup> <i>lrx10</i> <sup>-/+</sup> <i>lrx11</i> <sup>-/-</sup><br>X Col | Col X<br><i>lrx8</i> <sup>-/-</sup> <i>lrx9</i> <sup>-/-</sup> <i>lrx10</i> <sup>-/+</sup> <i>lrx11</i> <sup>-/-</sup> | <i>lrx8</i> <sup>-/-</sup> <i>lrx9</i> <sup>-/-</sup> <i>lrx10</i> <sup>-/-</sup> <i>lrx11</i> <sup>-/+</sup><br>X Col | Col X<br><i>lrx8</i> <sup>-/-</sup> <i>lrx9</i> <sup>-/-</sup> <i>lrx10</i> <sup>-/-</sup> <i>lrx11</i> <sup>-/+</sup> |
|--------------------------|------------------------------------------------------------------------------------------------------------------------|------------------------------------------------------------------------------------------------------------------------|------------------------------------------------------------------------------------------------------------------------|------------------------------------------------------------------------------------------------------------------------|
| F1                       | <i>lrx10</i> <sup>-/+</sup> = 30                                                                                       | <i>lrx10</i> <sup>-/+</sup> = 12                                                                                       | <i>lrx11</i> <sup>-/+</sup> = 27                                                                                       | <i>lrx11</i> <sup>-/+</sup> = 9                                                                                        |
| TE                       | 100                                                                                                                    | 40                                                                                                                     | 90                                                                                                                     | 30                                                                                                                     |
| Chi <sup>2</sup> P-value | 1                                                                                                                      | 0.001                                                                                                                  | 0.7                                                                                                                    | 0.0001                                                                                                                 |

Crosses (female X male); F1 = 60 plants; TE = Transmission efficiency

**Table S2: List of Primers**

| Target Sequence     | Primer          | Sequence                                  |
|---------------------|-----------------|-------------------------------------------|
| <b>LRX8</b>         | <b>Lrx8 F1</b>  | GAGATTGTGTTTATTGGGAACAAC                  |
|                     | Lrx8 R1         | ATGGTGTCTCAGGCTTTGGACTAG                  |
| <b>LRX9</b>         | <b>Lrx9 F1</b>  | AAGATACAACGAATTTGAAGGAAG                  |
|                     | Lrx9 R1         | TTCTCCGGTTTAGGAGATTCATG                   |
| <b>LRX10</b>        | T.Lrx10 F1      | GTTTGTCTCCGGATGTGAAGCT                    |
|                     | <b>Lrx10 R1</b> | GGTTGTGGTTTATGAACTGGCCTA                  |
| <b>LRX11</b>        | <b>Lrx11 F3</b> | TACCTTAGGGAGGTATCTTGCAG                   |
|                     | Lrx 11 R        | ATCGAATTCGTGCATTAGCTTTAGC                 |
|                     | <b>LBb1.3</b>   | ATTTTGCCGATTTCCGGAAC                      |
| <b>LRX8 frgt1</b>   | LRX8 proF1      | <u>CTGCAGTTGGCCTCATTAAAGTTAGTAGTTCC</u>   |
|                     | LRX8 terR1      | <u>GTGCAGCTCAAATCTATTGTTGTTCAAGAAGATG</u> |
| <b>LRX8 frgt2</b>   | LRX8 proF2      | <u>GTGCACCATCCCCGAGACAATTGGTAA</u>        |
|                     | LRX8 terR2      | <u>TCTAGAAAGTACCGAGACTTTTCCTCGTTG</u>     |
| <b>5' qRT_LRX8</b>  | 5'qRTLX8_F1     | GCGGGGATTGACCTTAACCA                      |
|                     | 5'qRTLX8_R1     | GAAACGGACCAACGAAACGG                      |
| <b>3' qRT_LRX8</b>  | 3'qRTLX8_F1     | TCACCAAACCAACACCAACAC                     |
|                     | 3'qRTLX8_R1     | ACTCTGGCTTAGGTTCCCTTTGG                   |
| <b>5' qRT_LRX9</b>  | 5'qRTLX9_F1     | ATACCGTCGTTGCCACCTTT                      |
|                     | 5'qRTLX9_R1     | AACCAACCCAATTGGCCGTA                      |
| <b>3' qRT_LRX9</b>  | 3'qRTLX9_F1     | GTGGTTAGTCGTCCTGTGGATT                    |
|                     | 3'qRTLX9_R1     | GTGTTTTTGGTGTCTCGGGTTT                    |
| <b>5' qRT_LRX10</b> | 5'qRTLX10_F1    | CTACCATTCTGATTCCCTCGG                     |
|                     | 5'qRTLX10_R1    | GAGGTAGAACACCAGTGAAGG                     |
| <b>3' qRT_LRX10</b> | 3'qRTLX10_F1    | CTACACCGTCGAAGTCTCCATC                    |
|                     | 3'qRTLX10_R1    | GAATGGACTGGTGGTGAAGTAG                    |
| <b>5' qRT_LRX11</b> | 5'qRTLX11_F1    | CTAACCGATACAGAAGCTGCCT                    |
|                     | 5'qRTLX11_R1    | CCTTTTTCCAAGCCTGAAGAGC                    |
| <b>3' qRT_LRX11</b> | 3'qRTLX11_F1    | ACGAGCGTGGAGGAAATTGATA                    |
|                     | 3'qRTLX11_R1    | GTGTGTCATCCAACGCAATCTC                    |
| <b>LRR11</b>        | Lrx11 proF      | CCTTGAGTCAACACTGCACTGG                    |
|                     | Lrx11_oE_F      | AGACTCGAGATGCCCTTCTATAAGCAGCC             |
|                     | Lrx11 PstIR     | <u>CTGCAGCAAGGACAAGTGCCTGGTGGCTC</u>      |
| <b>EXT11</b>        | Lrx11 PstIF     | <u>CTGCAGTCAACCGGGCGGTTGATC</u>           |
|                     | Lrx11 terR      | TACACAAGCCCATTATTAGGCC                    |

|                                             |               |                                          |
|---------------------------------------------|---------------|------------------------------------------|
| <b>LRX11 terminator</b>                     | PstI 11TF     | CCTGCAGTGATCTCAATCGAAGAGAG               |
|                                             | NotI 11TR-1   | TGCGGCCGCTACACAAGCCCATTATTAGG            |
| <b>Citrine1</b>                             | T.Cit_F_PstI  | CTGCAGCATGGTGAGCAAGGGCGAGGAG             |
|                                             | Cit_R_PstI    | GCTGCAGCTTGTACAGCTCGTCCATG               |
|                                             | T.Cit_R_PstI  | GCTGCAGCTACTTGTACAGCTCGTCCATG            |
| <b>Citrine2</b>                             | T.Cit-F       | CTGCAGCATGGTGAGCAAGGGCGAGGAG             |
|                                             | T.Cit-R_SpeI  | TACTAGTCTACTTGTACAGCTCGTCCATG            |
|                                             | NotI Subclone | TCGAGACTGGCGGCCGCCAGTC                   |
|                                             | SpeI Subclone | CTAGCTAGACATGCATGTCTAG                   |
| <b>Vector + proACT1</b>                     | TNF001        | CATGAGATCTTTTCTTCTACCTTTATGCAAACC        |
|                                             | TNF004        | CCTGAGATCTCCGATCTAGTAACATAGATG           |
| <b>nlsR<sub>m</sub>-2A-secG<sub>r</sub></b> | TNF002        | AAAAGGATCCCCACCATGGCTCCTAAGAAAAAGAGAAAGG |
|                                             | TNF003        | TTTTGGATCCTTACTTATCGTCATCATCCT           |

Underlined sequences correspond to introduced restriction sites. frgt = fragment. The sequence in red/bold are used along with the LBb1.3 primer for T-DNA amplification of mutant alleles. The *NotI* subclone and *SpeI* subclone were used to introduce *NotI* and *SpeI* sites into the *pSC* vector, respectively.

## Movies

**Movie S1:** *Irx8/9/11* pollen in liquid PGM showing high frequency of bursting during imbibition

**Movie S2:** Growing *Irx8/9/11* PT labelled with FM1-43 showing intermittent growth and the discharge of cytoplasmic membrane-stained components.

**Movie S3:** Growing *Irx8/9/11* PT labelled with FM1-43 showing vesicle budding.

## Figures

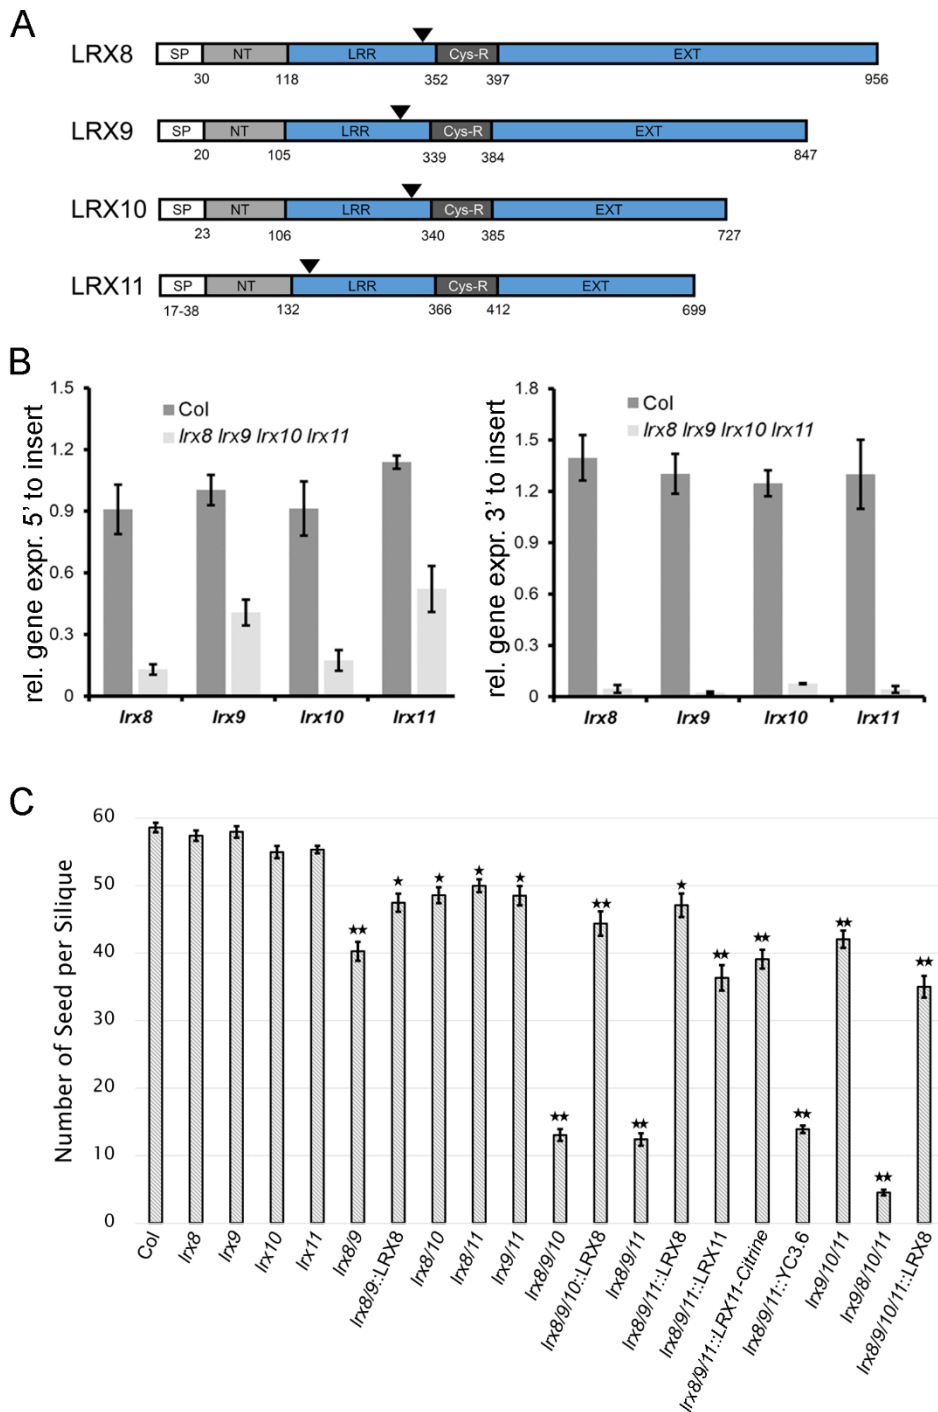

**Figure S1: LRX protein structures and effects of mutations on seed set. A.** Schematic representation of the LRX8, LRX9, LRX10 and LRX11 proteins. NT: N-terminal domain preceding the LRR domain; LRR: Leucine-rich repeat domain; Cys-R: Cys-rich hinge region; EXT: extensin domain. For sequence comparison, see Figure

S2. For T-DNA insertion sites, the corresponding position in the protein and the amino acid residues are indicated; *lrx8*: 340, *lrx9*: 301; *lrx10*: 312; *lrx11*: 137. **B.** Quantitative RT-PCR on total RNA extracted from open flowers. Coding sequences 5' upstream (left graph) and 3' downstream (right graph) of the insertion sites were amplified. Each data point represents technical triplicates for each of biological quadruplicates. While mRNA of the 5' regions is reduced but still detectable for all the *lrx* genes, mRNA of the 3' region is strongly reduced compared to the wild type. All differences between wild type and quadruple mutant are significantly different (t-test,  $p < 0.01$ ) Error bars = s.e.m.. **C.** Plot of the average number of seeds per silique in the wild-type and different mutants (mutant background and gene used for complementation are separated by a double colon). Statistical differences compared to the wild type are shown, t-test, \* =  $p < 0.01$ , \*\* =  $p < 0.0001$ ,  $n \geq 48$ , error bars = s.e.m..



```

* * : * *
LRX8 KPEESPKPEPPKPEESPKPQPPKQETPKPEESPKPQPPKQETPKPEESPKPQPPKQETPK
LRX9 KQKESPKPQPSKPEDSPKP-----EQPK
LRX10 -----HV-----VHS-----PPPASSPTSPPVHSTP-
LRX11 -----TP-----VHE-----PSPVLATPVDKPSVPS-

LRX8 PEESPKPQPPKQEPPKTEAPKMGSPPLESPVNDPYDASPIKRRRQPPSPSTEETKTT
LRX9 PEESPKPEQPQIPEP---TKPVSPNEAQGTPDDPYDASPVKNRRSPPPKVED-TR--
LRX10 -----SPVHKPQPPKESFPNDPYDQSPVKFRRSPPPPP-----
LRX11 -----RPVQKQPPKESFPDDPYDQSPVTKRRSPPPPAP-----
: . * * : * * * * * * * : . * * * *

LRX8 SPQSPPVHSPPPPPVHSPPP-PVFSPP--PPMHS--PPPPVYSPPPPVHSPPPPPVHSP
LRX9 -----VPPQPPMPSPPSPPIYSPPPPVHSPPPPVYSSP
LRX10 -----VHSPPPSPIHSPPPPVYSPPPPPVYSPPPPPVYSP-----PPPPVHSP
LRX11 -----VNSPPPPVYSPPPPPVHSP--PPVHSP-PPPPVYSP-----PPP-----
* * * * : * * * * : * * * * * * *

LRX8 PPPVHSPPPPVHSPPPPVHSPPPPVHSPPPPVHSPPPPVQSPPPPVFSPPPPAPIYSPP
LRX9 PPPH-----VYSPPPPVASPPP--PSPPPVHSPPPPVFSPPPPVFSPPPPSPVYSP
LRX10 PPPVHSPPPPVHSPPPPVHSPPPPVHSPPPPVHSPPPPVYSPPPPVHSPPPPV---HSP
LRX11 -----PPPVHSPPPPVFSPPPPVYSP-----
* * * * * * * . * * * *

LRX8 PPPVHSPPPPVHSPPP-PPVHSPPPPVHSPPPPVHSPPPPVHSPPPPVHSPPPPSPIYSP
LRX9 -PPSHSPPPPVYSPPPP-----TFSPPTHNTNQPPMGATP-TQAPTPSSETTQV
LRX10 PPPVHSPPPPVYSPPPPPPVHSPPPPVFSPPPPVHSPPPP-----VYSP
LRX11 PPPVHSPPPPVHSPPPAPVHSPPPPVHSP--PPPP-----VYSP
* * * * * * * : * * * * . * * * * * *

LRX8 P-----PPVFSPP--PKPVTPLPPATSPMANAPTSSSESG-----EISTPVQA
LRX9 PTPSSESDQSQILSPVQAPTQVQSTPS-SEPTQVPTPSSSESYQAPNLSPVQAPTQVQA
LRX10 P-----PPVYSP--PPPVKSPPPPVYSP---P-----PLL
LRX11 P-----PPVFSPP--PS---QSPVVYSP---P-----PPR
* : * * * * * * * * * *

LRX8 PTPDSEDIEAPSD---SNH-----SPVFKSSPAPSPDSEPEVEAPVPSSEP-----
LRX9 PTTSSETSQVPTPSSSNQSPSQAPTPILEPVHAPTPN-SKPVQSPTPSSEPVSSPEQSE
LRX10 P----KM-----SSPPTQTPVNS-----
LRX11 P----KI-----NSPPVQSPPPA-----
* . . : * :

LRX8 EVEAPKQSEATPSSSPPSSNPSPDV--TAPPSEDNDDGDNEFILPPNIGHQYASPPPPMFP
LRX9 EVEAPEPTPVNPSSV-PSSSPSTDTSIPPPENDDDDDGDEFILPPHIGHQYASPPPPMFQ
LRX10 -----PPRTP-----SQT-VEAPPSEEFILPPHIGHQYASPPPPMFQ
LRX11 -----PVEKKE-----TPPAHAPAPSDDEEFILPPHIGHQYASPPPPMFA
. : * : * * * * * * * * * *

LRX8 GY
LRX9 GY
LRX10 GY
LRX11 GY
* *

```

**Figure S2:** Alignment of LRX8, LRX9, LRX10, LRX11, and LRX4. Alignment was performed using the Clustal O(1.2.4) software. Identical positions are indicated in

black, conserved and similar positions are indicated in grey. The asterisks, colons, and single dots refer to identical, conserved, and similar positions in LRX8-LRX11 only. The LRR domain is delimited by arrowheads and linked to the extensin domain by the conserved Cys-rich hinge domain (indicated with a red line). The extensin domain is characterized by repetitive, sequences rich in the (S-P4)<sub>n</sub> motif, but is diverse among the proteins, except the last 20 residues that are again highly conserved. For LRX4, only sequences of the N-terminal half are shown that reveal conservation among LRX proteins, i.e. from the end of the signal peptide to the Cys-rich hinge region.

**A** Pollen germination and pollen tube growth after 5 h in vitro

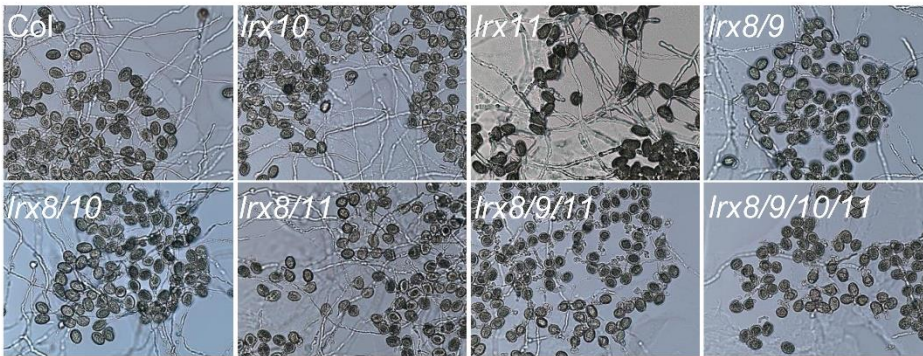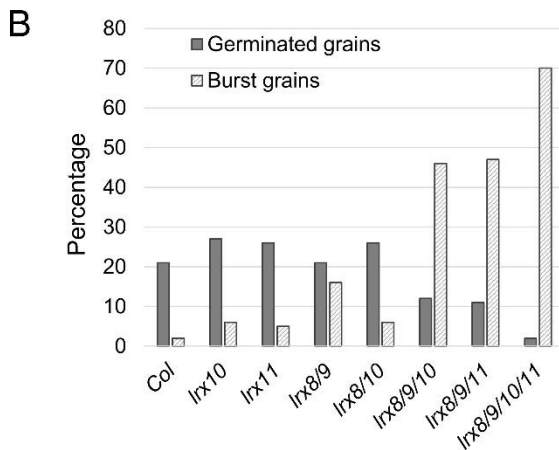

**C** Semi in vivo pollen germination and pollen tube growth after 5 h

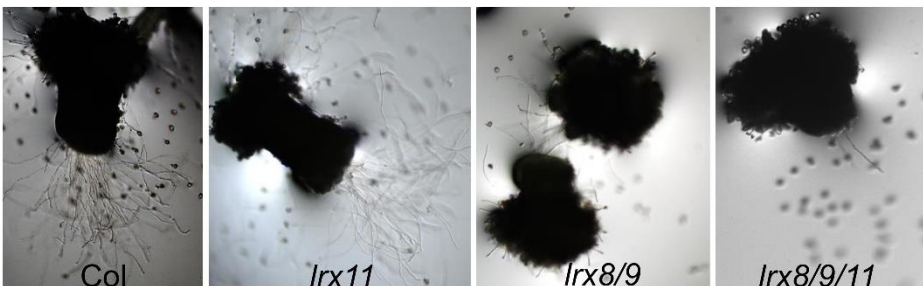

**Figure S3: *In vitro* and semi *in vivo* pollen germination after 5 h incubation. A.** Representation of pollen germination in the wild type and different *lrx* mutants. Lower germination and higher frequency of PG bursting were observed in the *lrx8/9*, *lrx8/9/11*, and *lrx8/9/10/11* mutants. **B.** Plot showing the percentage of germinated and burst grains. Non-germinated PGs were distinguished from germinated PGs by the absence of a detectable PT. **C.** Semi in vivo PT growth showing severe defects in the *lrx8/9* and *lrx8/9/11* mutants compared to the wild type.



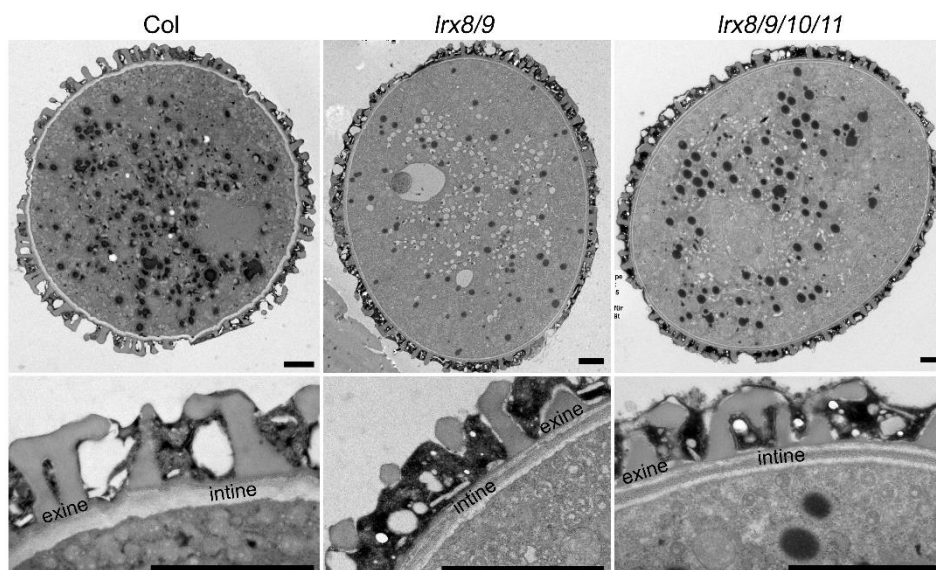

**Figure S4: Ultrastructure of pollen grains.** Upper panels are full transverse sections through the PGs and lower panels are close-up view showing the pollen wall (intine and exine). A band of electron dense material is seen sandwiched in the intine of *lrx8/9* and *lrx8/9/10/11* mutants, but not in the wild type. Scale bar = 2  $\mu$ m.

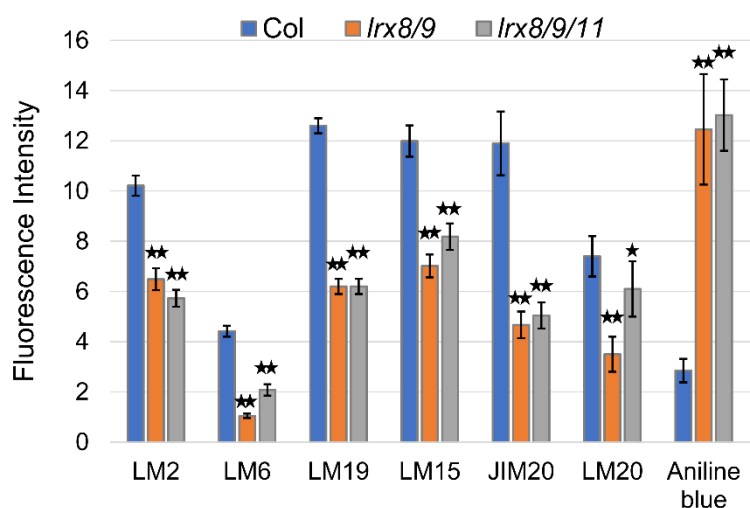

**Figure S5: Quantification of immunolabeling cell-wall epitopes.** Signal intensity of the different cell wall epitopes indicated in wild-type, *lrx8/9*, and *lrx8/9/11* PTs. Statistics, t-test, \* =  $p < 0.01$ , \*\* =  $p < 0.001$ ,  $n \geq 75$ , error bar = s.e.m..

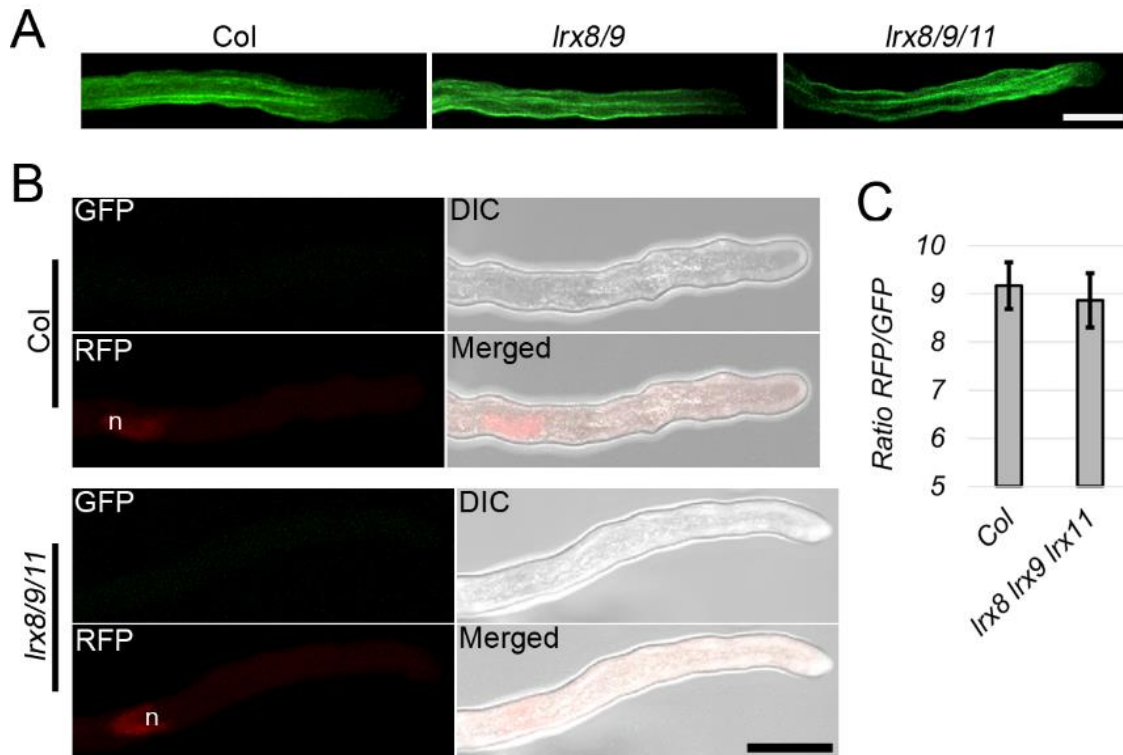

**Figure S6: Cytoskeletal organization and cytoplasmic accumulation of secretory vesicles.** **A.** Representative images of the actin filaments showing a similar orientation between wild-type, *lrx8/9*, and *lrx8/9/11* PTs. **B.** Expression of nlsRm-2A-secGf in PTs showing the RFP signal (red) in the nucleus and GFP (almost invisible green) in the cytoplasm, the corresponding DIC and merged images included. **C.** Plot shows comparable ratio of RFP signal in the nucleus to GFP in the cytoplasm.  $n \geq 50$ , error bar = s.e.m., Scale bar = 10  $\mu\text{m}$ .

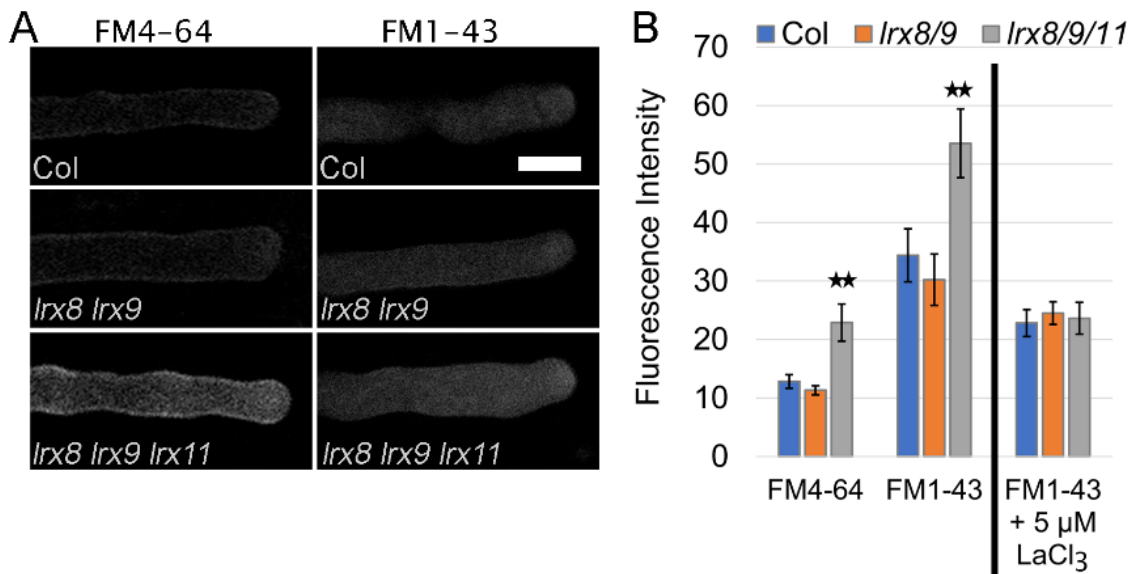

**Figure S7: Endocytosis rate in wild-type and *lrx* mutant pollen tubes. A.** Representative images of FM4-64 and FM1-43 stained PTs in standard PGM showing higher intensity in *lrx8/9/11* than wild-type and *lrx8/9* PTs. **B.** Plot of the fluorescence intensity for both stains in standard PGM and for FM1-43 in PGM substituted with 5 μM LaCl<sub>3</sub>. The rate of dye uptake by endocytosis is significantly higher in the *lrx8/9/11* mutant in standard PGM compared to wild-type and *lrx8/9* PTs, but not in PGM substituted with 5 μM LaCl<sub>3</sub>. Statistics, t-test, \*\* =  $p < 0.001$ ,  $n \geq 50$ , error bar = s.e.m., Scale bar = 10 μm.

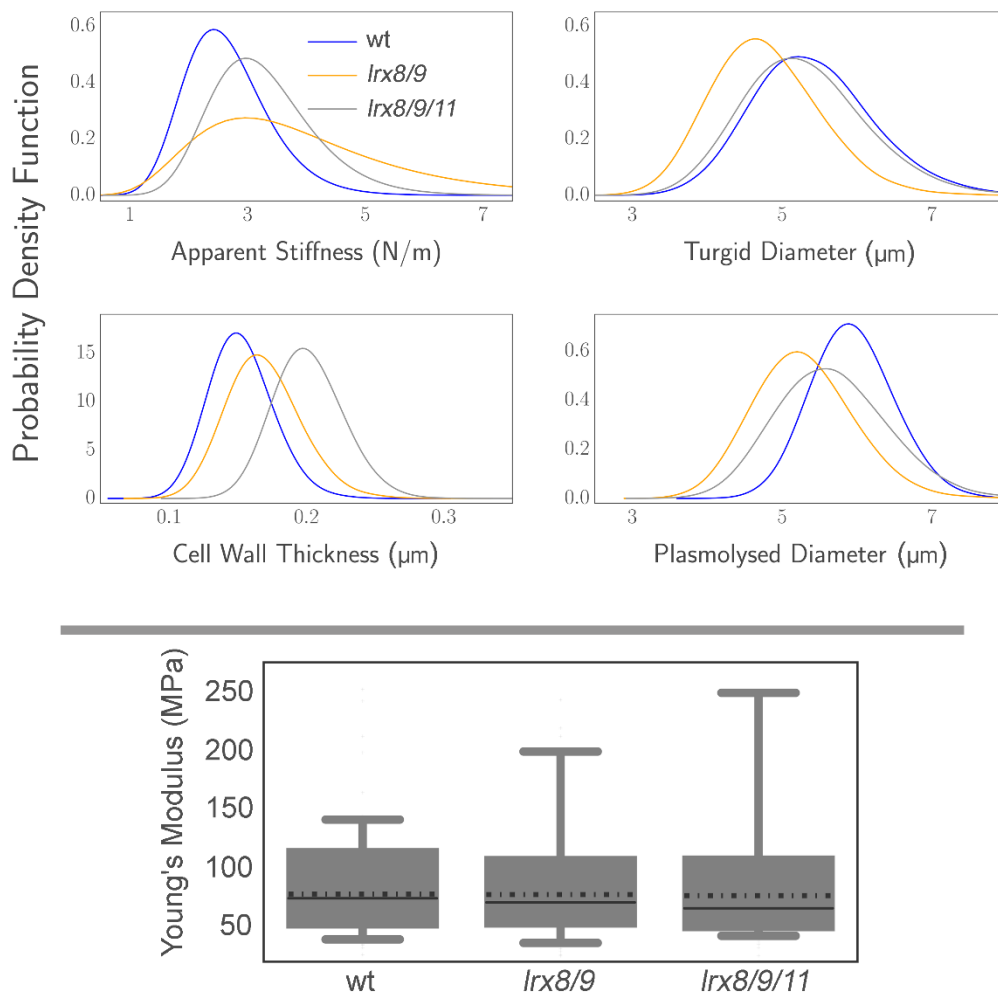

**Figure S8: Mechanical properties of wild-type and *lrx* mutant pollen tubes. Top:** Input parameters for the FEM model. These include the CFM determined apparent stiffness of the PT, the TEM determined cell wall thickness, and the diameter of turgid and plasmolyzed PTs. These values are shown as probability density functions. **Bottom:** boxplot of the FEM deduced Young's modulus of the cell wall. Interestingly, despite the differences in the cell wall structure between the wild type and *lrx* mutants, the Young's (elastic) modulus does not seem to change significantly. Solid lines: median, dotted lines: mean.
